# Supplementary material for: The Cannabinoid Receptor CB1 Interacts with the WAVE1 Complex and Plays a Role in Actin Dynamics and Structural Plasticity in Neurons
Source: PubMed Central journal article supplement (PMC4619884; doi:10.1371/journal.pbio.1002286), 2015-10-23
Supplement: pbio.1002286.s008.pdf [file pbio.1002286.s008.pdf]

| Rank | Protein Name                                                                           |       | rPQ Score |
|------|----------------------------------------------------------------------------------------|-------|-----------|
| 1    | CB1-eGFP                                                                               |       | 313.60    |
| 2    | Clathrin heavy chain 1                                                                 | CLH   | 116.16    |
| 3    | Cannabinoid receptor 1                                                                 | CNR1  | 96.00     |
| 4    | Sodium/potassium-transporting ATPase subunit alpha-2                                   | AT1A2 | 85.53     |
| 5    | AP-2 complex subunit alpha-2                                                           | AP2A2 | 80.57     |
| 6    | AP2-associated protein kinase 1                                                        | AAK1  | 77.29     |
| 7    | Wiskott-Aldrich syndrome protein family 1                                              | WASF1 | 48.20     |
| 8    | Nck-associated protein 1                                                               | NCKP1 | 45.01     |
| 9    | Dynamin-1                                                                              | DYN1  | 41.80     |
| 10   | Amphiphysin                                                                            | AMPH  | 38.95     |
| 11   | Synaptic vesicle glycoprotein 2A                                                       | SV2A  | 36.06     |
| 12   | Band 4.1-like protein 3                                                                | E41L3 | 35.59     |
| 13   | Septin-9                                                                               | SEPT9 | 35.41     |
| 14   | Cytochrome b-c1 complex subunit Rieske, mitochondrial                                  | UCRI  | 34.35     |
| 15   | V-type proton ATPase 116 kDa subunit a isoform 1 OS=Mus musculus GN=Atp6v0a1 PE=1 SV=2 | VPP1  | 33.99     |
| 16   | Adenylyl cyclase-associated protein 1                                                  | CAP1  | 33.78     |
| 17   | Catenin delta-2                                                                        | CTND2 | 32.43     |
| 18   | Cytoplasmic FMR1-interacting protein 2                                                 | CYFP2 | 32.22     |
| 19   | Voltage-dependent anion-selective channel protein 3                                    | VDAC3 | 32.00     |
| 20   | Glial fibrillary acidic protein                                                        | GFAP  | 31.15     |
| 21   | cAMP-dependent protein kinase type II-beta regulatory subunit                          | KAP3  | 30.40     |
| 22   | Sodium-driven chloride bicarbonate exchanger                                           | S4A10 | 30.40     |
| 23   | Vacuolar protein sorting-associated protein 35                                         | VPS35 | 30.40     |
| 24   | Plasma membrane calcium-transporting ATPase 2                                          | AT2B2 | 29.81     |
| 25   | Plasma membrane calcium-transporting ATPase 2                                          | AT2B2 | 29.81     |
| 26   | Ankyrin-2                                                                              | ANK2  | 28.84     |
| 27   | V-type proton ATPase subunit H                                                         | VATH  | 28.80     |
| 28   | Cystein & glycine rich protein 1                                                       | CSRP1 | 27.45     |
| 29   | Microsomal glutathione S-transferase 3                                                 | MGST3 | 25.60     |
| 30   | Solute carrier family 12 member 5                                                      | S12A5 | 24.76     |

| Rank | Protein Name                                                    |       | rPQ Score |
|------|-----------------------------------------------------------------|-------|-----------|
| 31   | Contactin-1                                                     | CNTN1 | 24.71     |
| 32   | Clathrin coat assembly protein AP180                            | AP180 | 23.11     |
| 33   | Band 4.1-like protein 2                                         | E41L2 | 22.47     |
| 34   | Ras-related protein Rab-3C                                      | RAB3C | 22.40     |
| 35   | Immunoglobulin superfamily member 8                             | IGSF8 | 21.81     |
| 36   | Homer protein homolog 1                                         | HOME1 | 19.49     |
| 37   | Na(+)/H(+) exchange regulatory cofactor NHE-RF1                 | NHRF1 | 19.20     |
| 38   | Neurofilament light polypeptide                                 | NFL   | 18.73     |
| 39   | Guanine nucleotide-binding protein G(z) subunit alpha           | GNAZ  | 17.74     |
| 40   | V-type proton ATPase subunit B, brain isoform                   | VATB2 | 17.18     |
| 41   | Synaptic vesicle glycoprotein 2B                                | SV2B  | 16.79     |
| 42   | Electrogenic sodium bicarbonate cotransporter 1                 | S4A4  | 16.44     |
| 43   | Tenascin-R                                                      | TENR  | 16.33     |
| 44   | Major prion protein                                             | PRIO  | 16.27     |
| 45   | Septin-4                                                        | SEPT4 | 16.19     |
| 46   | Brain-specific angiogenesis inhibitor 1-associated protein 2    | BAIP2 | 16.00     |
| 47   | Spectrin beta chain, erythrocyte                                | SPTB1 | 16.00     |
| 48   | CaM kinase-like vesicle-associated protein                      | CAMKV | 15.03     |
| 49   | Rabphilin-3A                                                    | RP3A  | 14.63     |
| 50   | DnaJ homolog subfamily A member 2                               | DNJA2 | 14.60     |
| 51   | cAMP-dependent protein kinase catalytic subunit alpha           | KAPCA | 14.40     |
| 52   | PH and SEC7 domain-containing protein 3                         | PSD3  | 13.46     |
| 53   | Neural cell adhesion molecule 1                                 | NCAM1 | 13.45     |
| 54   | Coiled-coil-helix-coiled-coil-helix domain-containing protein 6 | CHCH6 | 13.20     |
| 55   | G protein-regulated inducer of neurite outgrowth 1              | GRIN1 | 13.08     |
| 56   | Abl interactor 2                                                | ABL2  | 12.80     |
| 57   | Gap junction alpha-1 protein                                    | CXA1  | 12.80     |
| 58   | Junction plakoglobin                                            | PLAK  | 12.80     |
| 59   | Ras-related protein Rab-35                                      | RAB35 | 12.80     |
| 60   | V-type proton ATPase subunit d 1                                | VA0D1 | 12.00     |

| Rank | Protein Name                                                   |       | rPQ Score |
|------|----------------------------------------------------------------|-------|-----------|
| 61   | Elongation factor 1-alpha 1                                    | EF1A1 | 11.91     |
| 62   | Guanine nucleotide-binding protein G(q) subunit alpha          | GNAQ  | 11.74     |
| 63   | Gephyrin                                                       | GEPH  | 11.45     |
| 64   | Lipid phosphate phosphohydrolase 3                             | LPP3  | 11.20     |
| 65   | Ras-related protein Rab-5C                                     | RAB5C | 11.20     |
| 66   | Secretory carrier-associated membrane protein 1                | SCAM1 | 11.20     |
| 67   | V-type proton ATPase catalytic subunit A                       | VATA  | 10.92     |
| 68   | Spectrin beta chain, brain 1                                   | SPTB2 | 10.91     |
| 69   | LIM and SH3 domain protein 1                                   | LASP1 | 10.30     |
| 70   | Hepatocyte cell adhesion molecule                              | HECAM | 9.95      |
| 71   | Neurotrimin                                                    | NTRI  | 9.80      |
| 72   | Contactin-associated protein 1                                 | CNTP1 | 9.68      |
| 73   | cAMP-dependent protein kinase type II-alpha regulatory subunit | KAP2  | 9.60      |
| 74   | Dual specificity mitogen-activated protein kinase kinase 1     | MP2K1 | 9.60      |
| 75   | F-actin-capping protein subunit alpha-2                        | CAZA2 | 9.60      |
| 76   | Lymphocyte antigen 6H                                          | LY6H  | 9.60      |
| 77   | Voltage-dependent L-type calcium channel subunit beta-4        | CACB4 | 9.60      |
| 78   | V-type proton ATPase subunit C 1                               | VATC1 | 9.60      |
| 79   | Spectrin alpha chain, brain                                    | SPTA2 | 9.19      |
| 80   | $\alpha$ -enolase                                              | ENOA  | 9.06      |
| 81   | Neurofilament medium polypeptide                               | NFM   | 9.00      |
| 82   | Ras-related C3 botulinum toxin substrate 1                     | RAC1  | 8.98      |
| 83   | Myelin-associated glycoprotein                                 | MAG   | 8.60      |
| 84   | Leukocyte surface antigen CD47                                 | CD47  | 8.33      |
| 85   | Ras-related protein Rab-11A                                    | RB11A | 8.30      |
| 86   | Regulator of G-protein signaling 7                             | RGS7  | 8.17      |
| 87   | Clathrin light chain B                                         | CLCB  | 8.00      |
| 88   | Myristoylated alanine-rich C-kinase substrate                  | MARCS | 8.00      |
| 89   | WD repeat-containing protein 7                                 | WDR7  | 8.00      |
| 90   | Sodium/potassium-transporting ATPase subunit beta-2            | AT1B2 | 7.53      |

| Rank | Protein Name                                                                  |       | rPQ Score |
|------|-------------------------------------------------------------------------------|-------|-----------|
| 91   | 4F2 cell-surface antigen heavy chain                                          | 4F2   | 7.05      |
| 92   | Cell adhesion molecule 3                                                      | CADM3 | 6.87      |
| 93   | Beta-soluble NSF attachment protein                                           | SNAB  | 6.83      |
| 94   | Voltage-dependent anion-selective channel protein 2                           | VDAC2 | 6.81      |
| 95   | Dynamin-1-like protein                                                        | DNM1L | 6.60      |
| 96   | Vesicle-associated membrane protein-associated protein B                      | VAPB  | 6.56      |
| 97   | Actin-related protein 2/3 complex subunit                                     | ARPC5 | 6.40      |
| 98   | Cystein-rich protein 2                                                        | CRIP2 | 6.40      |
| 99   | Endophilin-A1                                                                 | SH3G2 | 6.40      |
| 100  | Endothelin B receptor-like protein 2                                          | ETBR2 | 6.40      |
| 101  | Monoacylglycerol lipase ABHD12                                                | ABD12 | 6.40      |
| 102  | Phosphatidylinositol 4,5-bisphosphate 5-phosphatase A                         | PI5PA | 6.40      |
| 103  | Plexin-A1                                                                     | PLXA1 | 6.40      |
| 104  | Transmembrane protein 65                                                      | TMM65 | 6.40      |
| 105  | Coronin-1A                                                                    | COR1A | 5.39      |
| 106  | V-type proton ATPase subunit E 1                                              | VATE1 | 5.36      |
| 107  | PKC and casein kinase substrate in neurons protein                            | PACN1 | 5.27      |
| 108  | GTPase HRas                                                                   | RASH  | 5.10      |
| 109  | Catenin beta-1                                                                | CTNB1 | 4.80      |
| 110  | CB1 cannabinoid receptor-interacting protein 1                                | CNRP1 | 4.80      |
| 111  | Dolichyl-diphosphooligosaccharide--protein glycosyltransferase 48 kDa subunit | OST48 | 4.80      |
| 112  | Flotillin-1                                                                   | FLOT1 | 4.80      |
| 113  | Protein bassoon                                                               | BSN   | 4.80      |
| 114  | Rho-related GTP-binding protein RhoG                                          | RHOG  | 4.80      |
| 115  | Syntaxin-12                                                                   | STX12 | 4.80      |
| 116  | Transforming protein RhoA                                                     | RHOA  | 4.80      |
| 117  | Transgelin-3                                                                  | TAGL3 | 4.80      |
| 118  | Voltage-gated potassium channel subunit beta-2                                | KCAB2 | 4.26      |
| 119  | Sodium- and chloride-dependent GABA transporter 3                             | S6A11 | 4.07      |
| 120  | Sodium- and chloride-dependent GABA transporter 1                             | SC6A1 | 3.83      |

| Rank | Protein Name                                                                |       | rPQ Score |
|------|-----------------------------------------------------------------------------|-------|-----------|
| 121  | Vesicular inhibitory amino acid transporter                                 | VIAAT | 3.73      |
| 122  | DnaJ homolog subfamily C member 5                                           | DNJC5 | 3.60      |
| 123  | Disintegrin and metalloproteinase domain-containing protein 23              | ADA23 | 3.50      |
| 124  | Tyrosine-protein phosphatase non-receptor type substrate 1                  | SHPS1 | 3.47      |
| 125  | Catenin alpha-2                                                             | CTNA2 | 3.35      |
| 126  | Protein CDV3 (carnitine deficiency-associated gene expressed in ventricle ) | CDV3  | 3.32      |
| 127  | Adenylate cyclase type 5                                                    | ADCY5 | 3.20      |
| 128  | Dematin                                                                     | DEMA  | 3.20      |
| 129  | DmX-like protein 2                                                          | DMXL2 | 3.20      |
| 130  | Dolichyl-diphosphooligosaccharide--protein glycosyltransferase subunit 2    | RPN2  | 3.20      |
| 131  | F-actin-capping protein subunit beta                                        | CAPZB | 3.20      |
| 132  | Gamma-aminobutyric acid receptor subunit beta-2                             | GBRB2 | 3.20      |
| 133  | Neural cell adhesion molecule 2                                             | NCAM2 | 3.20      |
| 134  | Solute carrier family 2, facilitated glucose transporter member 1           | GTR1  | 3.20      |
| 135  | Talin-2                                                                     | TLN-2 | 3.20      |
| 136  | Disks large homolog 3                                                       | DLG3  | 2.53      |
| 137  | AP-2 complex subunit alpha-1                                                | AP2A1 | 2.11      |
| 138  | Vesicle-fusing ATPase                                                       | NSF   | 1.96      |
| 139  | Excitatory amino acid transporter 2                                         | EAA2  | 1.88      |
| 140  | AP-2 complex subunit beta                                                   | AP2B1 | 1.81      |
| 141  | Synapsin 1                                                                  | SYN1  | 1.63      |
| 142  | Septin-5                                                                    | SEPT5 | 1.52      |
| 143  | AP-2 complex subunit mu                                                     | AP2M1 | 1.45      |
| 144  | Sodium/potassium-transporting ATPase subunit alpha-1                        | AT1A1 | 1.42      |
| 145  | 2', 3'-cyclic-nucleotide 3'-phosphodiesterase                               | CN37  | 1.38      |
| 146  | Septin-2                                                                    | SEPT2 | 1.33      |
| 147  | Septin-7                                                                    | SEPT7 | 1.29      |
| 148  | Guanin nucleotide binding protein/ Goa                                      | GNAO  | 1.28      |
| 149  | Septin 11                                                                   | SEP11 | 1.18      |
| 150  | Septin-6                                                                    | SEPT6 | 1.17      |
